# Supplementary material for: Relationship between asymmetric nostril use and human emotional odours in cats
Source: Springer Nature journal article supplement (doi:10.1038/s41598-023-38167-w), 2023-07-06
Supplement: MOESM1 [file 41598_2023_38167_MOESM1_ESM.pdf]

## **Relationship between asymmetric nostril use and human emotional odours in cats**

**Serenella d'Ingeo<sup>1\*</sup>, Marcello Siniscalchi<sup>1</sup>, Valeria Straziota<sup>1</sup>, Gianluca Ventriglia<sup>1</sup>,  
Raffaella Sasso<sup>1</sup> & Angelo Quaranta<sup>1</sup>**

<sup>1</sup>Animal Physiology and Behaviour Unit, Department of Veterinary Medicine, University of  
Bari Aldo Moro, 70121 Bari, Italy.

\*Correspondence: [serenella.dingeo@uniba.it](mailto:serenella.dingeo@uniba.it)

## VISUAL ANALOGUE SCALE

### HAPPINESS

After watching the video, how do you feel?

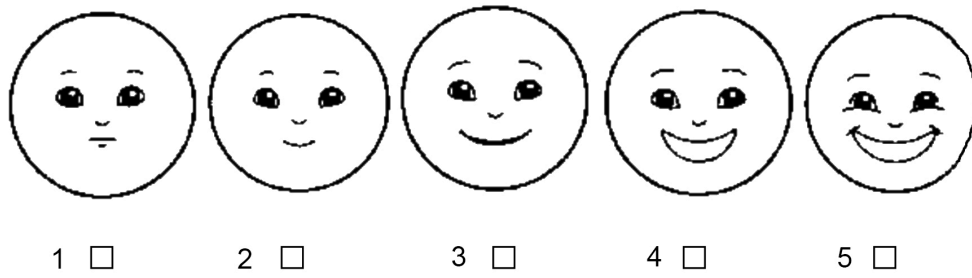

### FEAR

After watching the video, how do you feel?

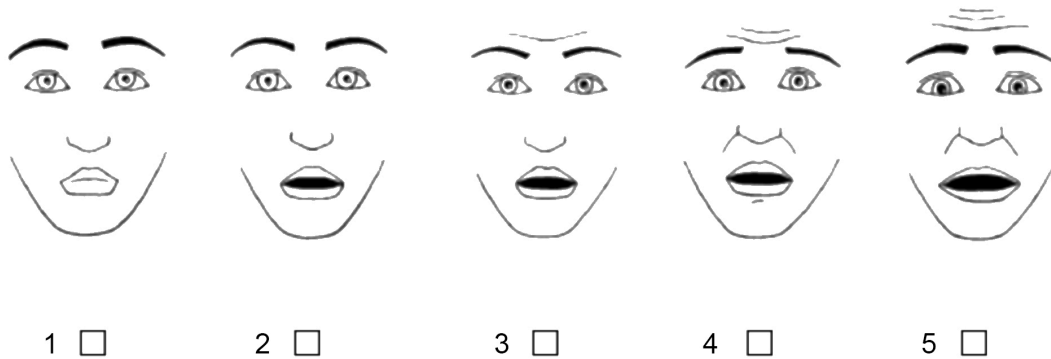

Figure S1. Visual analogue scale used to evaluate the donors' emotional response to "happiness" and "fear" eliciting movies [30].

| <b>Behavioural category</b>               |
|-------------------------------------------|
| <i>Severe stress</i>                      |
| Move back                                 |
| Fly away                                  |
| Hiding                                    |
| Crouched position                         |
| Arched back                               |
| Head back                                 |
| Ears rotated backward/flattened           |
| Eyes wide open                            |
| Tail held down and tense                  |
| Swishing tail                             |
| <i>Moderate stress</i>                    |
| Go away with tension in the body          |
| Go to the owner with tension in the body  |
| Standing tense                            |
| Resting tense                             |
| Sit tense                                 |
| Ears sideward                             |
| Ears backwards                            |
| Dilatated pupils with normal open eyes    |
| Half blink with dilatated pupils          |
| Twitching tail tip                        |
| <i>Relaxed</i>                            |
| Go away with relaxed body                 |
| Go to the owner with relaxed body         |
| Standing relaxed                          |
| Resting relaxed                           |
| Sit relaxed                               |
| Ears neutral (half-back)                  |
| Ears erected to front                     |
| Eyes soft                                 |
| Half blink                                |
| Narrowed eyes                             |
| Extended or loosely wrapped/downward tail |

Table S1. List of behaviours scored for behavioural analysis. Adapted from Bradshaw [36].

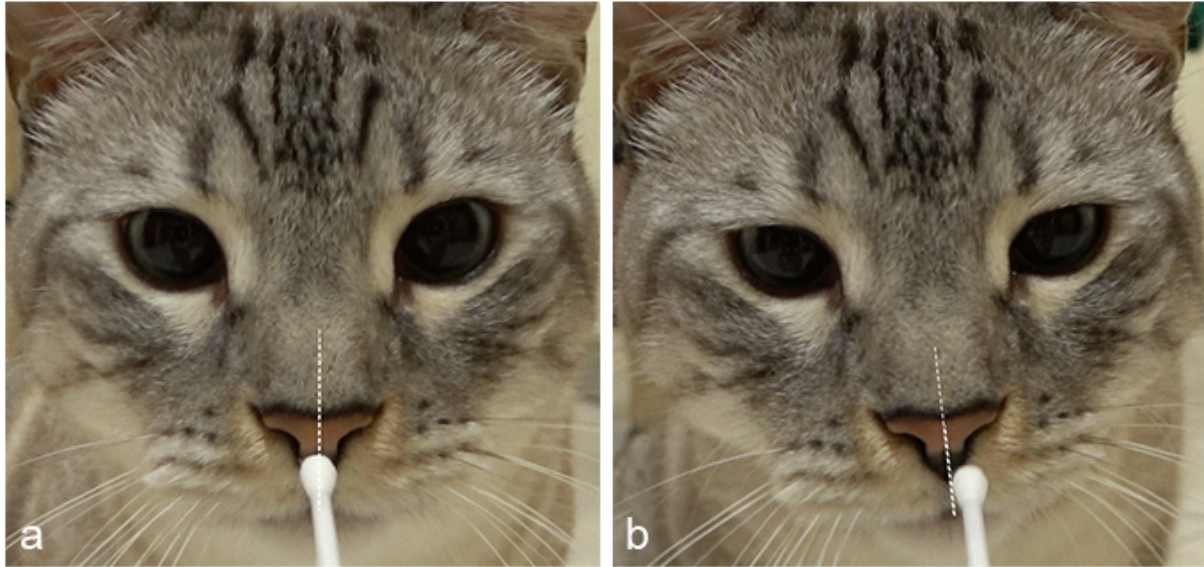

Figure S2. Cats' sniffing behaviour and nostril use: both nostrils (a) and left nostril preferential use (b) are shown (dotted line passing through the philtrum).
